# Supplementary material for: AgNPs/CuNPs/Bragg-PSi substrate subjected to thermal annealing in high-sensitivity detection on crystal violets and diphenyl phthalate
Source: Royal Society of Chemistry journal article supplement (doi:10.1039/d4ra04726e), 2025-01-01
Supplement: d4ra04726e1.pdf [file d4ra04726e1.pdf]

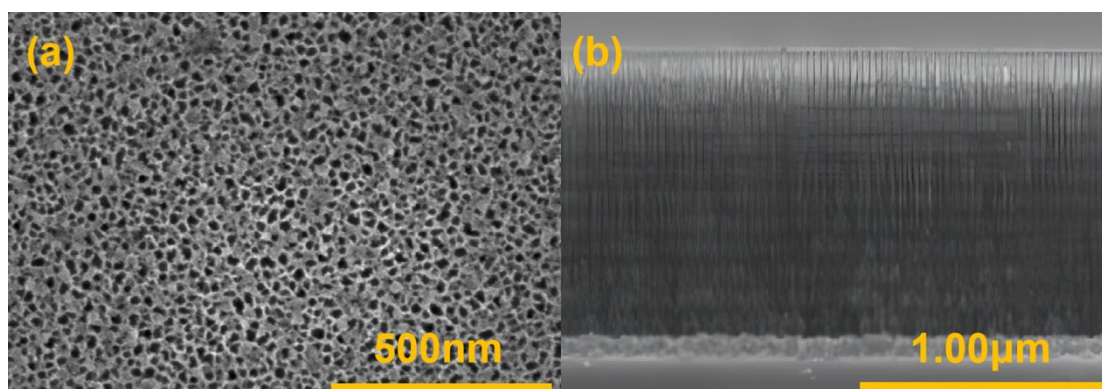

Fig. 1(a) Surface SEM image of a Bragg-PSi substrate.

Fig. 1(b) Cross-sectional SEM image of a Bragg-PSi substrate.

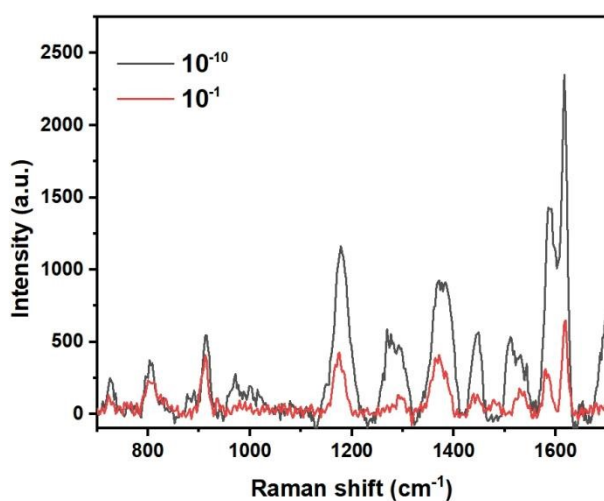

Fig. 2 The normal Raman spectra of  $10^{-1}$ M CV and the SERS spectra of  $10^{-10}$ M CV

As illustrated in Fig. 2, to determine the enhancement factor (EF) for the CuNPs/AgNPs/Bragg-PSi SERS substrate, we conducted measurements of the SERS spectrum for  $10^{-10}$ M CV and the standard spectrum for  $10^{-1}$ M CV. Subsequently, based on the characteristic peak at  $1617\text{ cm}^{-1}$  in CV Raman spectrum, we calculate the EF of SERS for substrate based on  $EF = (I_s \times C_0)/(C_s \times I_0)$ .  $I_s$  is the SERS signal intensity of CV with a concentration of  $10^{-10}$ M, and  $I_0$  is the Raman signal intensity of CV with a concentration of  $10^{-1}$ M CV on a bare silicon wafer. According to the formula, the EF of CuNPs/AgNPs/Bragg-PSi is  $3.64 \times 10^{11}$ .
